# Supplementary material for: Time trends and geographical variation in prescribing of drugs for diabetes in England from 1998 to 2017
Source: PubMed Central journal article supplement (PMC6099452; doi:10.1111/dom.13346), 2018-06-05
Supplement: DOM-20-2159-s001.pdf [file DOM-20-2159-s001.pdf]

# Time Trends and Geographical Variation in Prescribing of Drugs for Diabetes in England 1998-2017

## Supplementary Information

### Contents

#### Appendix 1: Additional Tables and Figures

- Table S1: Comparison of key features of each dataset used in our study, and the list of Figures and Tables for which each dataset is used.
- Table S2: Assignment of BNF drug names to diabetes drug classes.
- Table S3: Proportion of each drug class prescribed across England's practices, September 2016-August 2017.
- Table S4: Links to updated maps as shown in Figure 3.
- Figure S1: Prescribing trends for individual chemicals within each class of anti-diabetes drug in England, 1998-2016.
- Figure S2: Map of total spend on anti-diabetic drugs per patient and prescribing level of newer anti-diabetic drugs, by CCG.

#### Appendix 2: SQL and Python Codes for data extraction and analysis

## APPENDIX 1

**Table S1.** Comparison of key features of each dataset used in our study, and the list of Figures and Tables for which each dataset is used.

|                            | CPRD | PCA   | Practice-level |
|----------------------------|------|-------|----------------|
| Patient-level <sup>†</sup> | ✓    |       |                |
| Long term (from 1998)      | ✓    | ✓     |                |
| Freely available           |      | ✓     | ✓              |
| National coverage          |      | ✓     | ✓              |
| Identifiable organisations |      |       | ✓              |
| Monthly data               | ✓    |       | ✓              |
| <i>Figures</i>             | 1    | 2, S1 | 3, 4, S2       |
| <i>Tables</i>              |      |       | 1, S3, S4      |

<sup>†</sup>Patient-level data allows selection of patients by diagnosis, and determination of the sequence in which drugs are prescribed to individual patients.

**Table S2.** Assignment of BNF drug names to diabetes drug classes. Other drugs were assigned to class “Other”.

| Chemical code | Chemical name                        | Class                      |
|---------------|--------------------------------------|----------------------------|
| 0601023A0     | Acarbose                             | Alpha-glucosidase          |
| 0601023AU     | Ins Degludec/Liraglutide             | Combination                |
| 0601023AV     | Saxagliptin/Dapagliflozin            | Combination                |
| 0601023AA     | Vildagliptin                         | DPP-4                      |
| 0601023AC     | Saxagliptin                          | DPP-4                      |
| 0601023AD     | Metformin Hydrochloride/Sitagliptin  | DPP-4                      |
| 0601023AE     | Linagliptin                          | DPP-4                      |
| 0601023AF     | Linagliptin/Metformin                | DPP-4                      |
| 0601023AH     | Saxagliptin/Metformin                | DPP-4                      |
| 0601023AJ     | Alogliptin/Metformin                 | DPP-4                      |
| 0601023AK     | Alogliptin                           | DPP-4                      |
| 0601023X0     | Sitagliptin                          | DPP-4                      |
| 0601023Z0     | Metformin Hydrochloride/Vildagliptin | DPP-4                      |
| 0601023AB     | Liraglutide                          | GLP-1                      |
| 0601023AI     | Lixisenatide                         | GLP-1                      |
| 0601023AQ     | Dulaglutide                          | GLP-1                      |
| 0601023Y0     | Exenatide                            | GLP-1                      |
| 0601022B0     | Metformin Hydrochloride              | Metformin                  |
| 0601023R0     | Repaglinide                          | Prandial glucose regulator |
| 0601023U0     | Nateglinide                          | Prandial glucose regulator |
| 0601023AG     | Dapagliflozin                        | SGLT-2                     |

|           |                                       |              |
|-----------|---------------------------------------|--------------|
| 0601023AL | Dapagliflozin/Metformin               | SGLT-2       |
| 0601023AM | Canagliflozin                         | SGLT-2       |
| 0601023AN | Empagliflozin                         | SGLT-2       |
| 0601023AP | Canagliflozin/Metformin               | SGLT-2       |
| 0601023AR | Empagliflozin/Metformin               | SGLT-2       |
| 0601021A0 | Glimepiride                           | Sulfonylurea |
| 0601021E0 | Chlorpropamide                        | Sulfonylurea |
| 0601021H0 | Glibenclamide                         | Sulfonylurea |
| 0601021M0 | Gliclazide                            | Sulfonylurea |
| 0601021P0 | Glipizide                             | Sulfonylurea |
| 0601021R0 | Gliquidone                            | Sulfonylurea |
| 0601021V0 | Tolazamide                            | Sulfonylurea |
| 0601021X0 | Tolbutamide                           | Sulfonylurea |
| 0601023B0 | Pioglitazone Hydrochloride            | TZD          |
| 0601023S0 | Rosiglitazone                         | TZD          |
| 0601023V0 | Metformin Hydrochloride/Rosiglitazone | TZD          |
| 0601023W0 | Metformin Hydrochloride/Pioglitazone  | TZD          |

**Table S3.** Proportion of each drug class prescribed across England's practices, September 2016-August 2017.

|                                  | Mean    | Std Dev | Median  | Lower Quartile | Upper Quartile | IQR     | Kurtosis |
|----------------------------------|---------|---------|---------|----------------|----------------|---------|----------|
| <b>Metformin (%)</b>             | 55.8    | 5.6     | 55.7    | 52.5           | 59.1           | 6.6     | 8.0      |
| <b>Sulfonylurea (%)</b>          | 21.7    | 5.7     | 21.8    | 17.9           | 25.5           | 7.6     | 5.0      |
| <b>DPP-4 (%)</b>                 | 13.4    | 5.3     | 13.3    | 9.8            | 16.8           | 7.0     | 2.7      |
| <b>TZD (%)</b>                   | 2.4     | 2.5     | 1.8     | 0.7            | 3.3            | 2.6     | 8.7      |
| <b>SGLT-2 (%)</b>                | 4.0     | 3.0     | 3.4     | 1.8            | 5.5            | 3.7     | 10.2     |
| <b>GLP-1 (%)</b>                 | 2.4     | 1.7     | 2.1     | 1.2            | 3.2            | 1.9     | 46.2     |
| <b>Non_Met_Non_SU (%)</b>        | 22.6    | 7.2     | 22.4    | 17.7           | 27.1           | 9.4     | 3.3      |
| <b>Total Anti-Diabetic Items</b> | 5,142   | 3,448   | 4,416   | 2,770          | 6,675          | 3,905   |          |
| <b>Total Anti-Diabetic Costs</b> | £56,967 | £38,929 | £48,568 | £29,758        | £75,269        | £45,510 |          |
| <b>Items per diabetic</b>        | 12.3    | 3.7     | 12.0    | 9.6            | 14.4           | 4.8     |          |
| <b>Cost per diabetic</b>         | £136    | £44     | £132    | £106           | £160           | £54     |          |

Percentages represent the proportion of items for each drug out of all anti-diabetic items prescribed (BNF paragraph 6.1.2). Standard deviation (and kurtosis for percentage measures) are included as metrics of variation in between regions. Items and Cost per Diabetic figures exclude 95 practices with no prevalence recorded in QOF. Non-Met Non-SU = Non-metformin, non-sulfonylurea.

**Table S4.** Links to updated maps as shown in Figure 3. Maps show relative volumes of each class of anti-diabetic drug prescribed, per 1000 items of all anti-diabetic items (BNF 6.1.2), for each CCG in England.

|                         |                                                                                                                                                                                                                                                                                                                                                                                                                                                                                                                                                                                                                                                                                                             |
|-------------------------|-------------------------------------------------------------------------------------------------------------------------------------------------------------------------------------------------------------------------------------------------------------------------------------------------------------------------------------------------------------------------------------------------------------------------------------------------------------------------------------------------------------------------------------------------------------------------------------------------------------------------------------------------------------------------------------------------------------|
| Metformin               | <a href="https://openprescribing.net/analyse/#org=CCG&amp;numIds=0601022B0&amp;denomIds=6.1.2&amp;selectedTab=map">https://openprescribing.net/analyse/#org=CCG&amp;numIds=0601022B0&amp;denomIds=6.1.2&amp;selectedTab=map</a>                                                                                                                                                                                                                                                                                                                                                                                                                                                                             |
| Sulfonylurea            | <a href="https://openprescribing.net/analyse/#org=CCG&amp;numIds=0601021H0,0601021M0,0601021P0,0601021A0,0601021X0,0601021E0&amp;denomIds=6.1.2&amp;selectedTab=map">https://openprescribing.net/analyse/#org=CCG&amp;numIds=0601021H0,0601021M0,0601021P0,0601021A0,0601021X0,0601021E0&amp;denomIds=6.1.2&amp;selectedTab=map</a>                                                                                                                                                                                                                                                                                                                                                                         |
| All others              | <a href="https://openprescribing.net/analyse/#org=CCG&amp;numIds=0601023AK,0601023AJ,0601023AE,0601023AF,0601023AD,0601023Z0,0601023AC,0601023AH,0601023X0,0601023AA,0601023B0,0601023S0,0601023V0,0601023W0,0601023AM,0601023AP,0601023AG,0601023AL,0601023AN,0601023AR,0601023Y0,0601023AB,0601023AI,0601023AQ&amp;denomIds=6.1.2&amp;selectedTab=map">https://openprescribing.net/analyse/#org=CCG&amp;numIds=0601023AK,0601023AJ,0601023AE,0601023AF,0601023AD,0601023Z0,0601023AC,0601023AH,0601023X0,0601023AA,0601023B0,0601023S0,0601023V0,0601023W0,0601023AM,0601023AP,0601023AG,0601023AL,0601023AN,0601023AR,0601023Y0,0601023AB,0601023AI,0601023AQ&amp;denomIds=6.1.2&amp;selectedTab=map</a> |
| DPP-4                   | <a href="https://openprescribing.net/analyse/#org=CCG&amp;numIds=0601023AK,0601023AJ,0601023AE,0601023AF,0601023AD,0601023Z0,0601023AC,0601023AH,0601023X0,0601023AA&amp;denomIds=6.1.2&amp;selectedTab=map">https://openprescribing.net/analyse/#org=CCG&amp;numIds=0601023AK,0601023AJ,0601023AE,0601023AF,0601023AD,0601023Z0,0601023AC,0601023AH,0601023X0,0601023AA&amp;denomIds=6.1.2&amp;selectedTab=map</a>                                                                                                                                                                                                                                                                                         |
| TZD                     | <a href="https://openprescribing.net/analyse/#org=CCG&amp;numIds=0601023B0,0601023S0,0601023V0,0601023W0&amp;denomIds=6.1.2&amp;selectedTab=map">https://openprescribing.net/analyse/#org=CCG&amp;numIds=0601023B0,0601023S0,0601023V0,0601023W0&amp;denomIds=6.1.2&amp;selectedTab=map</a>                                                                                                                                                                                                                                                                                                                                                                                                                 |
| SGLT-2                  | <a href="https://openprescribing.net/analyse/#org=CCG&amp;numIds=0601023AM,0601023AP,0601023AG,0601023AL,0601023AN,0601023AR&amp;denomIds=6.1.2&amp;selectedTab=map">https://openprescribing.net/analyse/#org=CCG&amp;numIds=0601023AM,0601023AP,0601023AG,0601023AL,0601023AN,0601023AR&amp;denomIds=6.1.2&amp;selectedTab=map</a>                                                                                                                                                                                                                                                                                                                                                                         |
| GLP-1                   | <a href="https://openprescribing.net/analyse/#org=CCG&amp;numIds=0601023Y0,0601023AB,0601023AI,0601023AQ&amp;denomIds=6.1.2&amp;selectedTab=map">https://openprescribing.net/analyse/#org=CCG&amp;numIds=0601023Y0,0601023AB,0601023AI,0601023AQ&amp;denomIds=6.1.2&amp;selectedTab=map</a>                                                                                                                                                                                                                                                                                                                                                                                                                 |
| DPP-4, SGLT-2 and GLP-1 | <a href="https://openprescribing.net/analyse/#org=CCG&amp;numIds=0601023AK,0601023AJ,0601023AE,0601023AF,0601023AD,0601023Z0,0601023AC,0601023AH,0601023X0,0601023AA,0601023AM,0601023AP,0601023AG,0601023AL,0601023AN,0601023AR,0601023Y0,0601023AB,0601023AI,0601023AQ&amp;denomIds=6.1.2&amp;selectedTab=map">https://openprescribing.net/analyse/#org=CCG&amp;numIds=0601023AK,0601023AJ,0601023AE,0601023AF,0601023AD,0601023Z0,0601023AC,0601023AH,0601023X0,0601023AA,0601023AM,0601023AP,0601023AG,0601023AL,0601023AN,0601023AR,0601023Y0,0601023AB,0601023AI,0601023AQ&amp;denomIds=6.1.2&amp;selectedTab=map</a>                                                                                 |

**a**

Trends of Sulfonylurea diabetes drugs by chemical

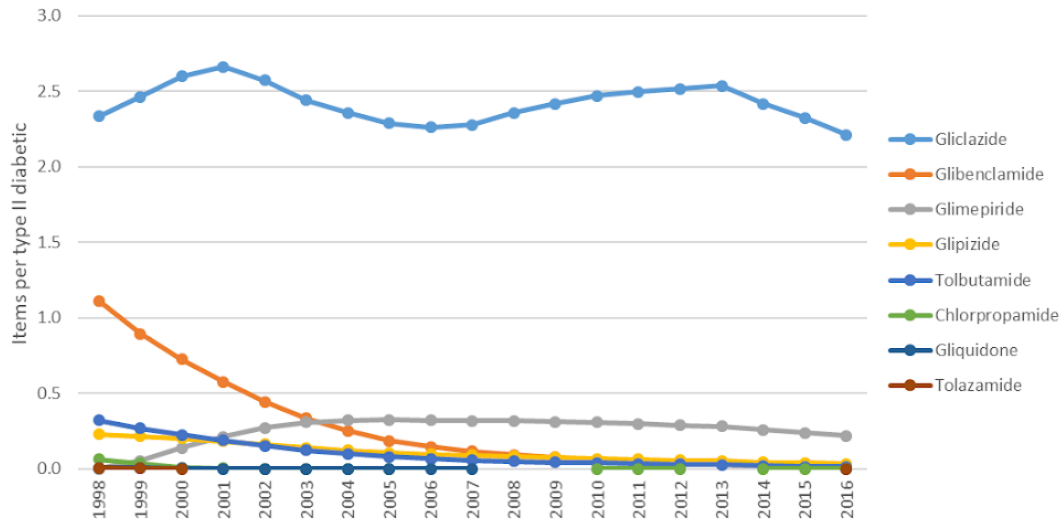**b**

Trends of TZD diabetes drugs by chemical

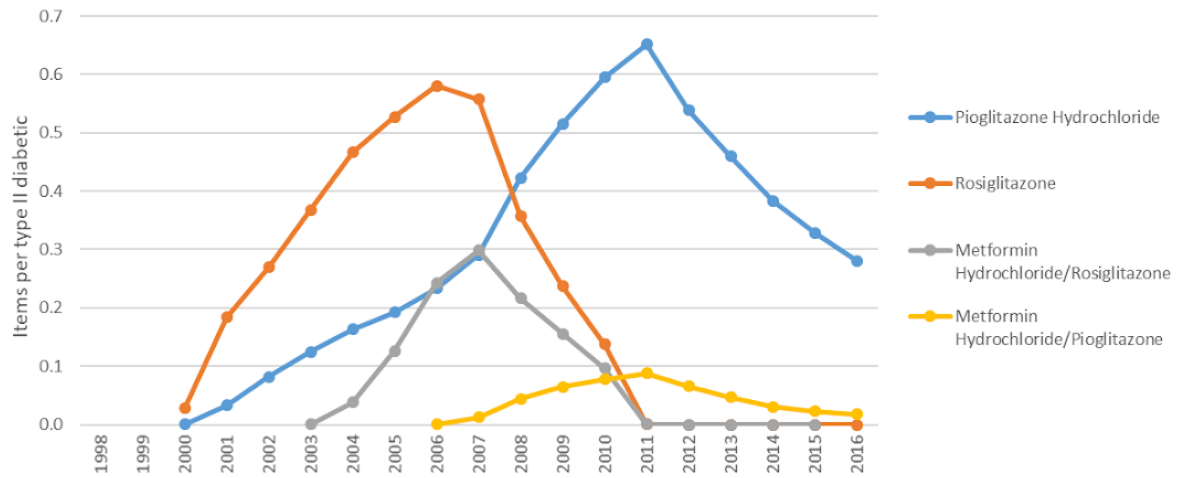**c**

Trends of DPP-4 diabetes drugs by chemical

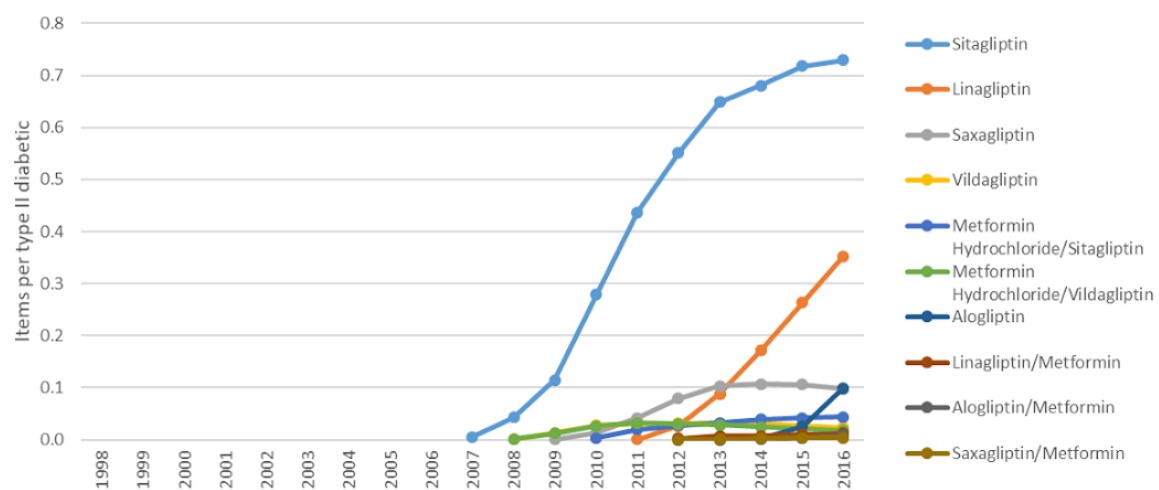

**d**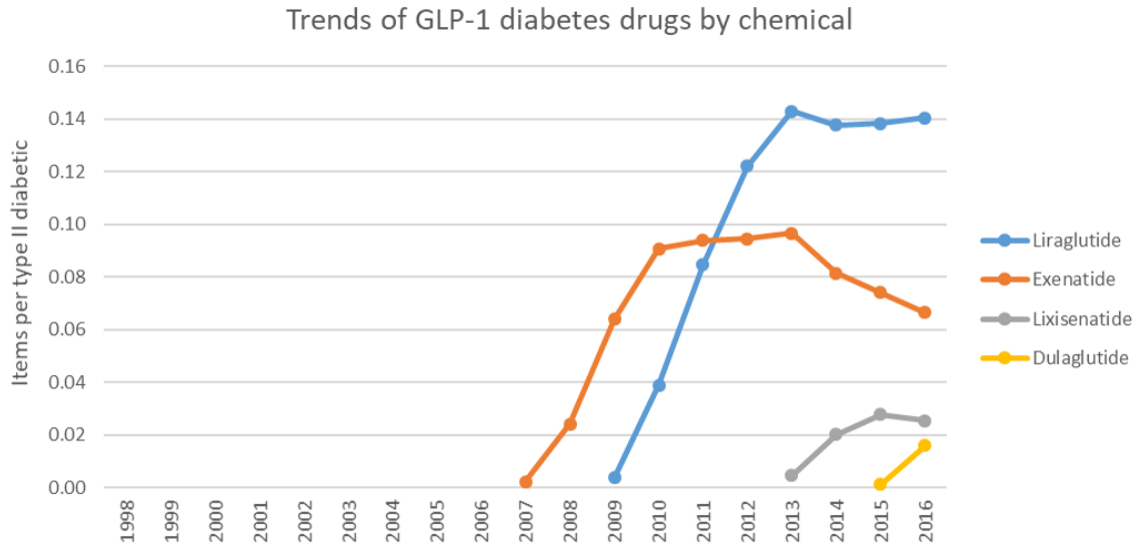**e**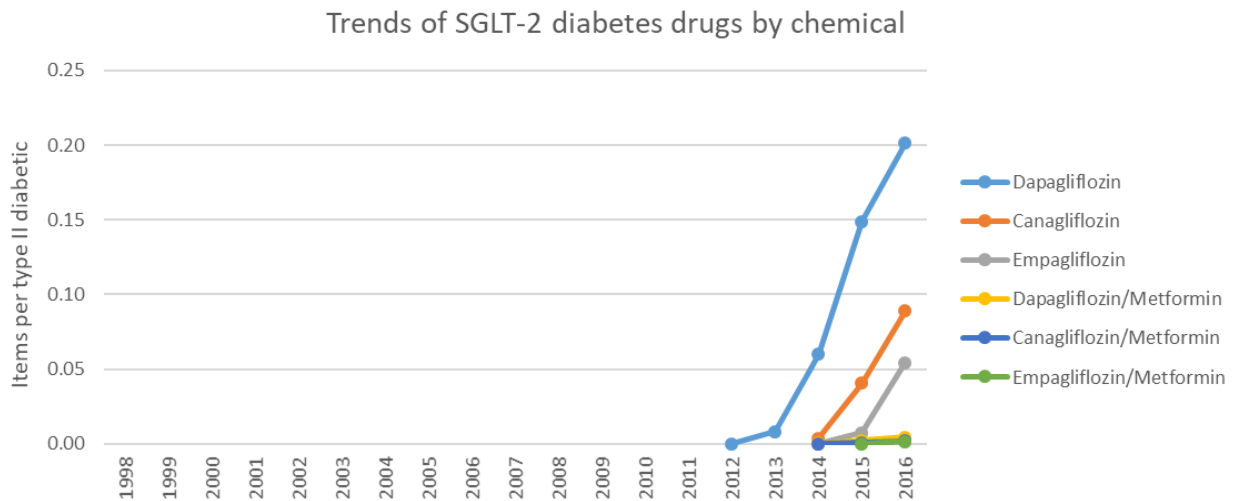

**Figure S1.** Prescribing trends for individual chemicals within each class of anti-diabetes drug in England, 1998-2016. Number of items dispensed per type II diabetic according to PCA data, within each class of diabetes drug: (a) Sulfonylurea, (b) TZD, (c) DPP-4, (d) GLP-1, (e) SGLT-2.

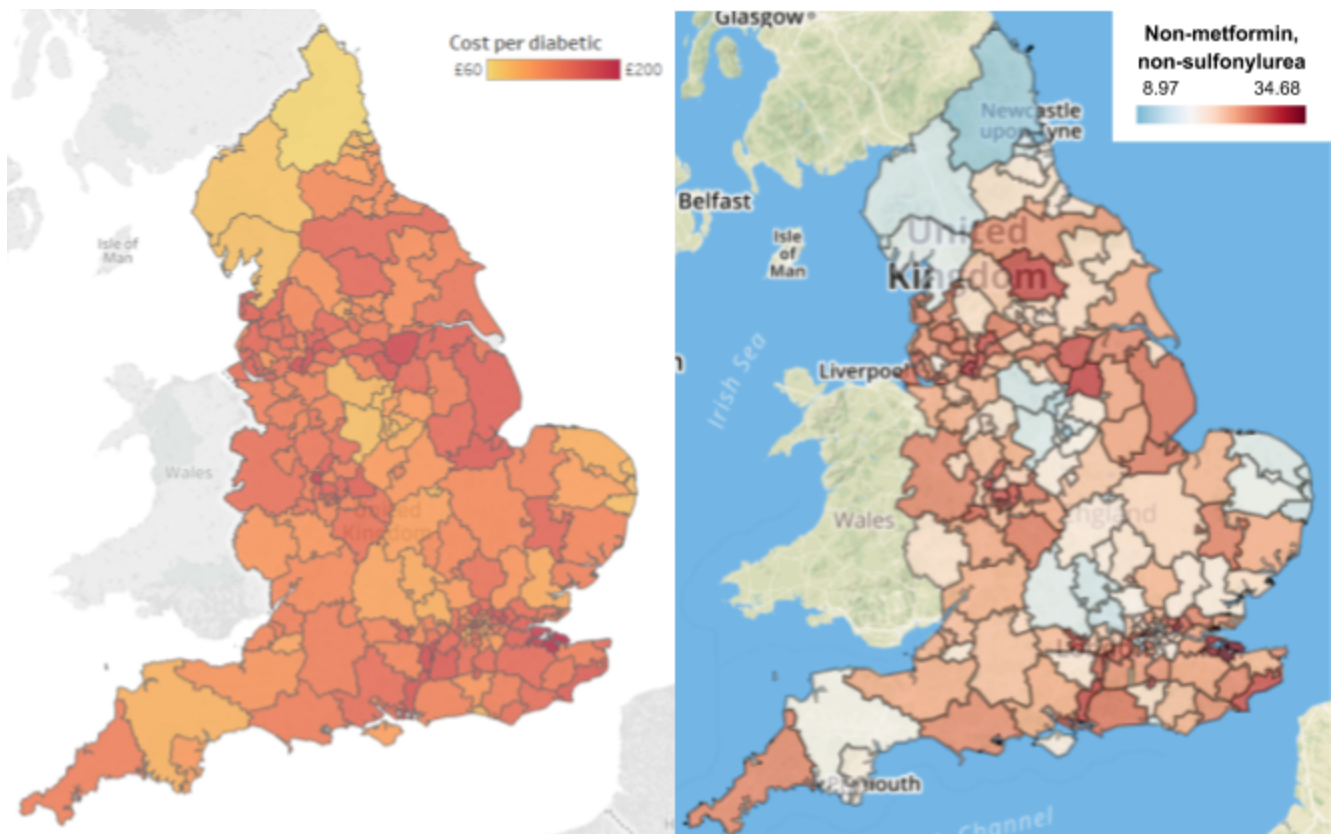

**Figure S2.** Map of total spend on anti-diabetic drugs per patient and prescribing level of newer anti-diabetic drugs, by CCG. A: Total spend on anti-diabetic drugs, Sept 2016-Aug 2017, corrected for number of patients with diabetes. B: Percentage of non-metformin, non-sulfonylurea anti-diabetic items prescribed of all anti-diabetic drugs (BNF paragraph 6.1.2), May 2017, from OpenPrescribing.net.

## APPENDIX 2 - SQL and Python Codes for data extraction and analysis

### 1. SQL code

#### a. Extraction of all practice-level data on anti-diabetic drugs.

```
SELECT * FROM ebmdatalab.hscic.prescribing
WHERE bnf_code like '060102%'
-- save as table ebmdatalab.helen.diabetes_prescribing
```

#### b. Extraction of all diabetes prescribing data from normalised PCA dataset

```
SELECT a.*, COALESCE(l.class, "Other") AS class
FROM ebmdatalab.helen.trends_from_pca_final_2016 a
LEFT JOIN ebmdatalab.helen.diabetes_drug_class_lookup2 l on
    l.chemical_name = a.chemical_current
WHERE section_current = "Drugs Used In Diabetes"
    AND (para_code_current = '2' OR l.class IS NOT NULL)
ORDER BY year
```

### 2. Python scripts for analysis of practice-level data:

#### a. Summary tables and savings calculations:

<https://gist.github.com/HelenCEBM/ebf64c09c39e6c1d706eaf08cc2cd422>

#### b. Decile charts:

<https://gist.github.com/HelenCEBM/b1f4068b1619c8dbb4578a3300c644ce>
